# Supplementary material for: Three-dimensional nickel nanowires modified by amorphous Fe nanosheets as electrocatalysts for the oxygen evolution reaction
Source: Royal Society of Chemistry journal article supplement (doi:10.1039/d3dt00535f), 2023-01-01
Supplement: d3dt00535f1.pdf [file d3dt00535f1.pdf]

## Supporting Information

### Three-dimensional nickel nanowires modified by amorphous Fe nanosheets as electrocatalyst for oxygen evolution reaction

Guoxu Zhou<sup>a</sup>, Denghe Gao<sup>a</sup>, Lichen Dong<sup>a</sup>, Lan Wang<sup>\*b</sup>, Hui Wang<sup>a</sup>, Xuyun Wang<sup>a</sup>,

Vladimir Linkov<sup>c</sup>, Rongfang Wang<sup>\*a</sup>

- a State Key Laboratory Base for Eco-Chemical Engineering, College of Chemical Engineering, Qingdao University of Science and Technology, Qingdao, China
- b Pinghu Normal College, Jiaxing University, Jiaxing, China
- c South African Institute for Advanced Material Chemistry, University of the Western Cape, Cape Town 7535, South Africa.

#### 1. Materials

Nickel foam (Ni Foam, Kunshan Jiayisheng Electronics Co., Ltd.), nickel chloride ( $\text{NiCl}_2 \cdot 6\text{H}_2\text{O}$ , 99%, Sinopharm Chemical Reagent Co., Ltd.), ferrous sulfate heptahydrate ( $\text{FeSO}_4 \cdot 7\text{H}_2\text{O}$ , 99%, Sinopharm Chemical Reagent Co., Ltd.) boric acid ( $\text{H}_3\text{BO}_3$ , 99.5%, Sinopharm Chemical Reagent Co., Ltd.), sodium citrate ( $\text{Na}_3\text{C}_6\text{H}_5\text{O}_7 \cdot 2\text{H}_2\text{O}$ , 99%, Sinopharm Chemical Reagent Co., Ltd.), chloroplatinic acid ( $\text{H}_2\text{PtCl}_6$ , 98%, Sinopharm Chemical Reagent Co., Ltd.), hydration Hydrazine ( $\text{N}_2\text{H}_4 \cdot \text{H}_2\text{O}$ , 85%, Sinopharm Chemical Reagent Co., Ltd.), potassium hydroxide (KOH, 85%, Sinopharm Chemical Reagent Co., Ltd.), hydrochloric acid (HCl, 37%, Sinopharm Chemical Reagent Co., Ltd.), ruthenium dioxide ( $\text{RuO}_2$ , Aladdin) and ultrapure water (18.2 MU cm) without further treatment.

#### 2. Electrodeposition of Fe on NF.

Nickel foam (NF) with dimensions of 2 x 3 cm was immersed in 3.0 M HCl solution and ultrasonicated for 10 min to remove surface oxides. 40 mL of the solution containing 0.5 M FeSO<sub>4</sub>·7H<sub>2</sub>O and 0.5 M H<sub>3</sub>BO<sub>3</sub> was used as an electrolyte for Fe electrodeposition, which was carried out at -1V for 20 s. The obtained samples were labeled as Fe /NF, respectively.

### 3. Reaction mechanism

The formation of Fe/Ni NWs/NF is divided into two steps, namely the growth of nanowires, and the electrodeposition process. The growth of nanowires is a hydrothermal reaction, and N<sub>2</sub>H<sub>4</sub> · H<sub>2</sub>O is a reducing agent. NiCl<sub>2</sub> · 6H<sub>2</sub>O is a nickel source to provide nickel ions; Na<sub>3</sub>C<sub>6</sub>H<sub>5</sub>O<sub>7</sub> is a complexing agent, which is used to control the reaction rate. H<sub>2</sub>PtCl<sub>6</sub> is a nucleating agent, which makes the reaction nucleate rapidly and lays a foundation for the formation of nanowires. The formation process of nanowires is carried out under the conditions of pH 12.5 at 80 oC with the assistance of the magnetic field. These conditions ensure that nanowires can grow slowly on the surface of nickel foam and are not easy to fall off. The reactions involved in nanowire growth are as follows:

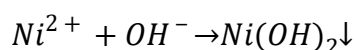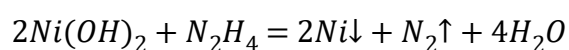

FeSO<sub>4</sub> · 7H<sub>2</sub>O is the iron source in the electrodeposition process. Fe<sup>2+</sup> is easily adsorbed on the cathode surface and preferentially deposited by discharge; Boric acid is a corrosion inhibitor, which can stabilize the pH of the electrodeposition solution and accelerate the deposition rate of iron. The following reaction occurred during the electrodeposition process.

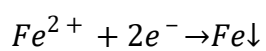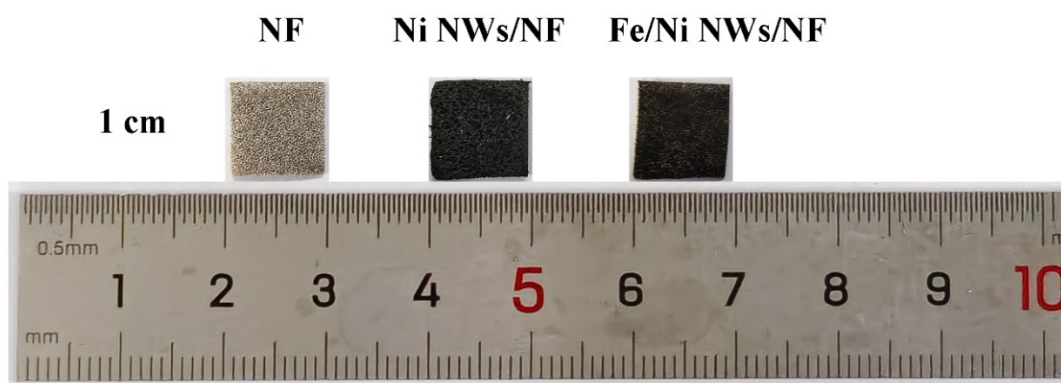

**Figure S1.** Picture of NF, Ni NWs/NF, Fe/Ni NWs/NF.

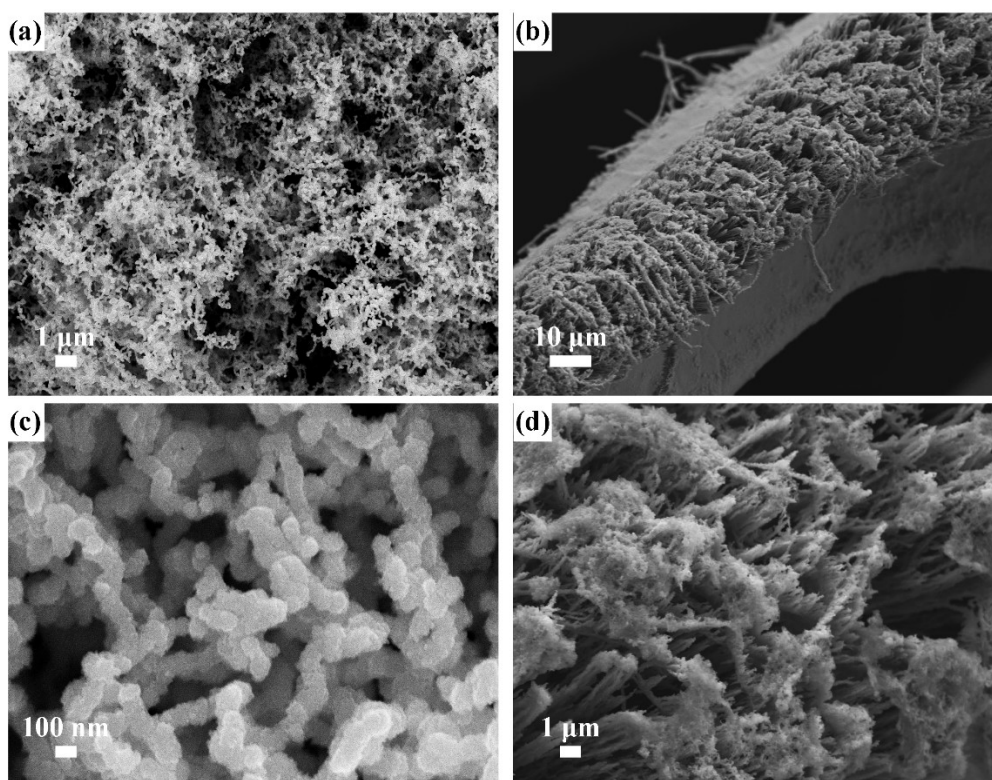

**Figure S2.** SEM images of (a,c)Ni/NF without magnetic field;and (b,d) reverse side of Ni NWs/NF with magnetic field.

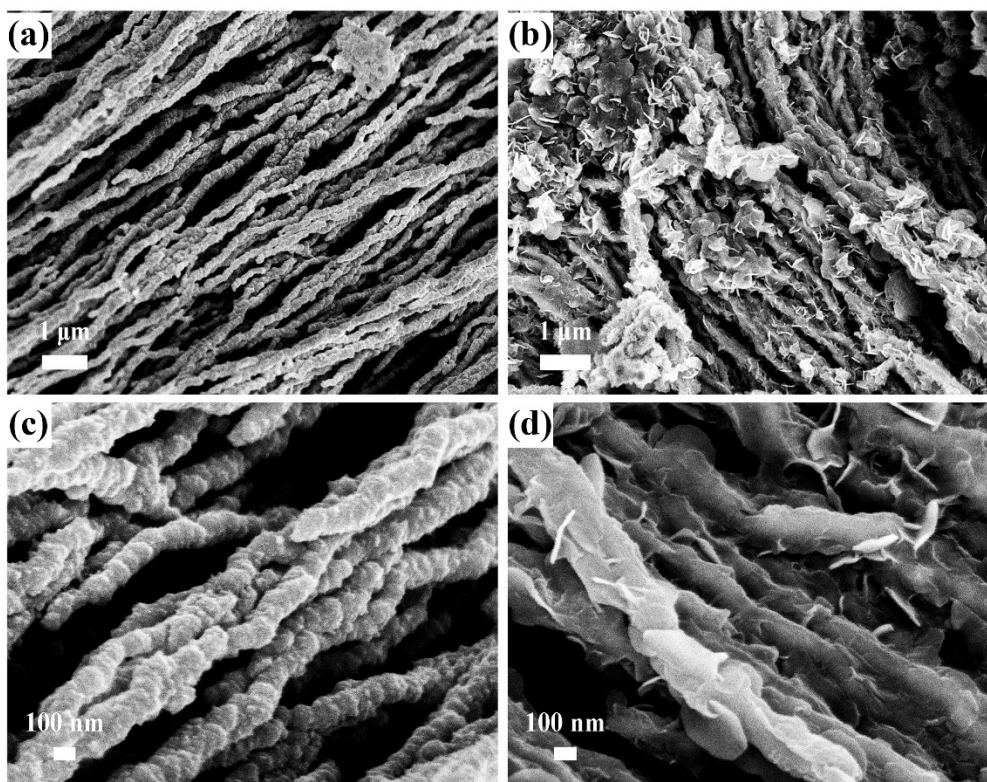

**Figure S3.** SEM images of different deposition time(a,c)10 s, (b,d)30 s.

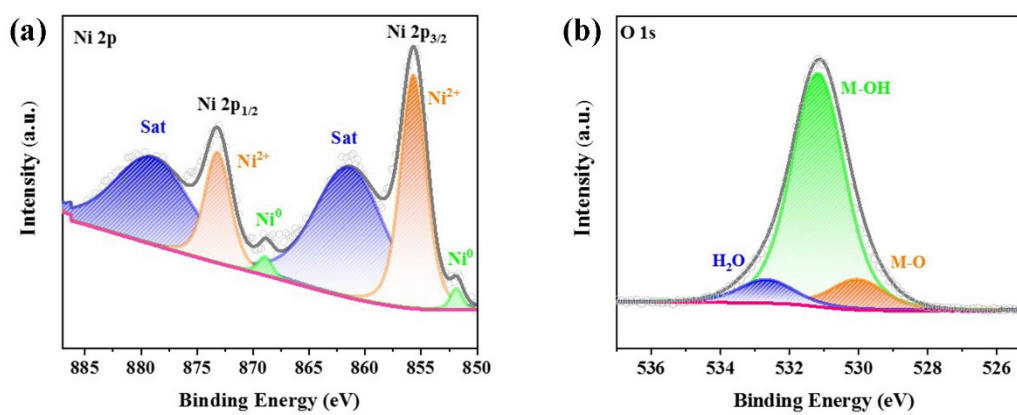

**Figure S4.** the deconvoluted high-resolution XPS spectra of (a) Ni 2p (Ni NWs/NF) and (b) O 1s (Fe/Ni NWs/NF).

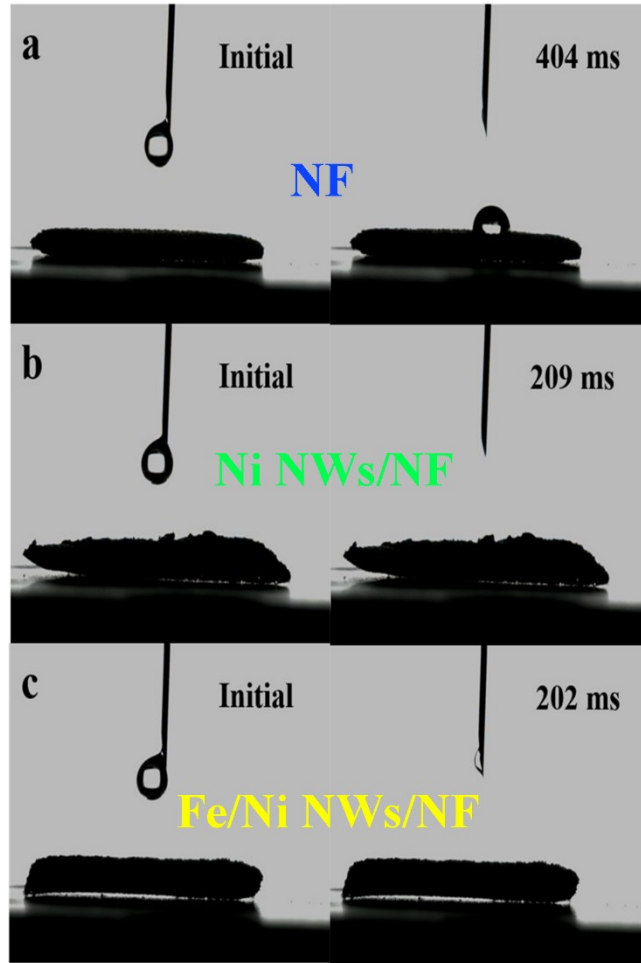

**Figure S5.** Contact Angle test for different samples.



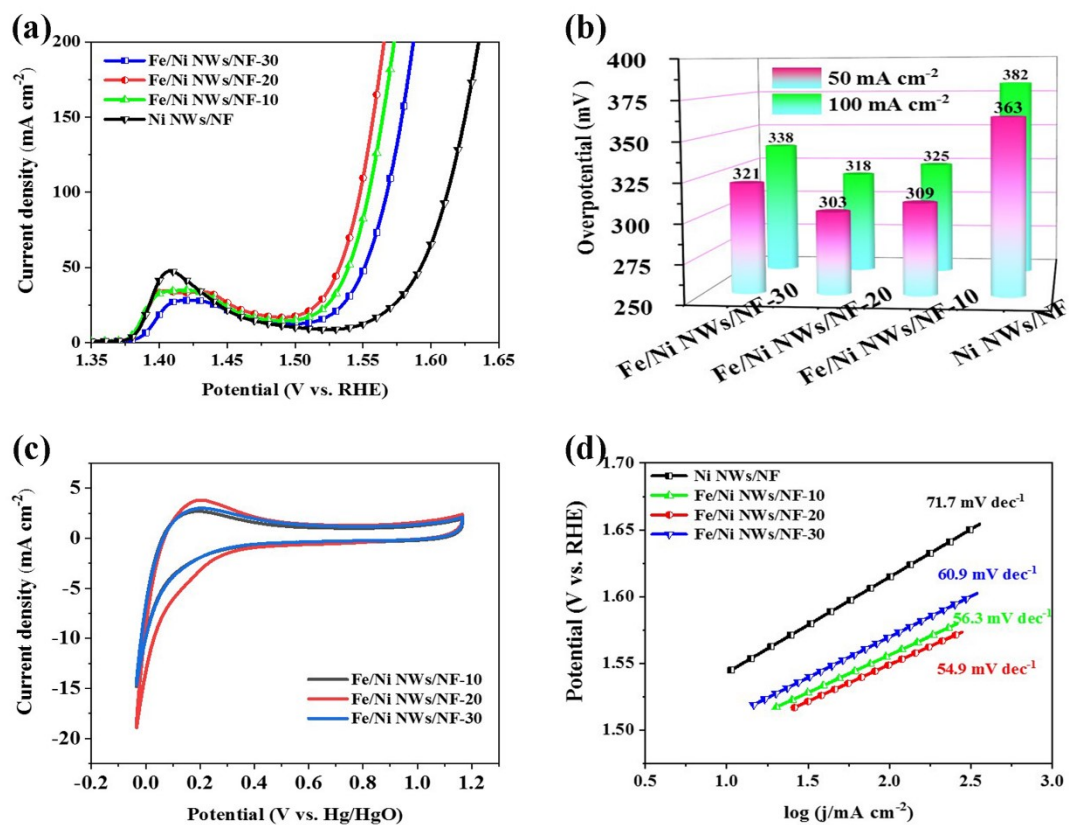

**Figure S6.** (a) OER LSVs of Ni NWs/NF, Fe/Ni NWs/NF-10, Fe/Ni NWs/NF-20, Fe/Ni NWs/NF-30 electrodes in 1.0 M KOH at a scan rate of 5 mV.s<sup>-1</sup>; (b) their Overpotential at 50 mA cm<sup>-2</sup> and 100 mA cm<sup>-2</sup>; (c) their Cyclic voltammetry; (d) their Tafel plots

**Table S1.** Fitting values of Fe/ Ni NWs/NF, Ni NWs/NF, Fe/NF, NF electrochemical composition in Nyquist

| Samples   | R <sub>s</sub> (ohm) | R <sub>ct</sub> (ohm) |
|-----------|----------------------|-----------------------|
| NF        | 1.06                 | 121.10                |
| Ni NWs/NF | 1.05                 | 17.07                 |
| Fe/NF     | 1.08                 | 15.63                 |

|               |      |      |
|---------------|------|------|
| Fe/ Ni NWs/NF | 1.06 | 0.82 |
|---------------|------|------|

**Table S2.** The metal content of Fe/Ni NWs/NF

| Test elements | Weight of sample(mg) | Elements content of sample |
|---------------|----------------------|----------------------------|
| Ni            | 40.2                 | 99.57%                     |
| Fe            | 40.2                 | 0.11%                      |

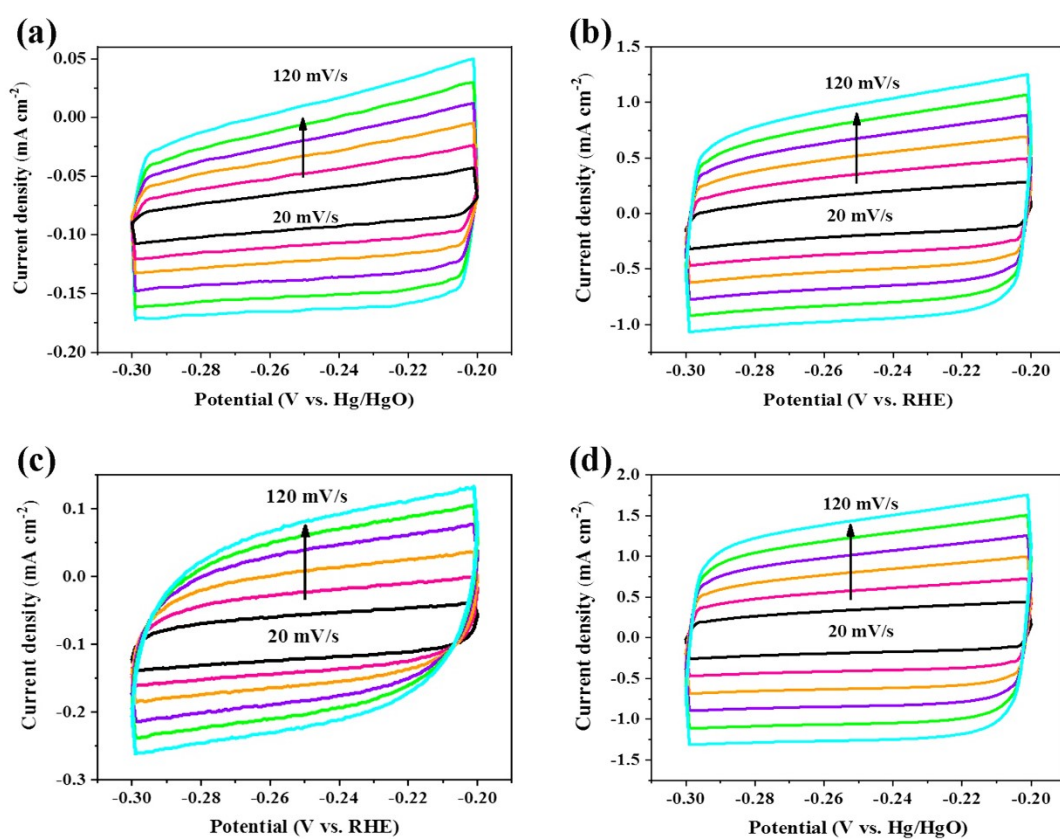

**Figure S7.** Cyclic Voltammetry plots of (a) NF; (b) Ni NWs/NF; (c) Fe/NF; (d) Fe/Ni NWs/NF.

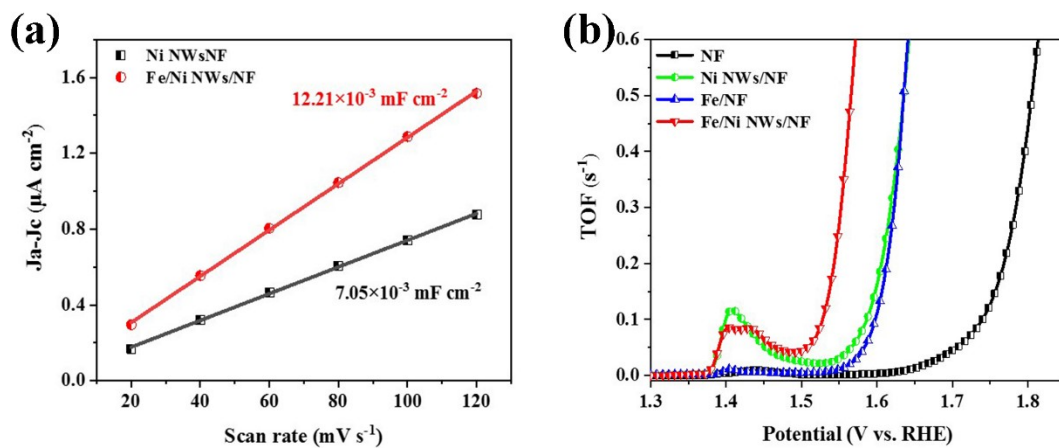

**Figure S8.** (a) Specific activity of Fe/Ni NWs/NF and Ni NWs/NF; (b) TOF value of NF, Ni NWs/NF, Fe/NF and Fe/Ni NWs/NF.

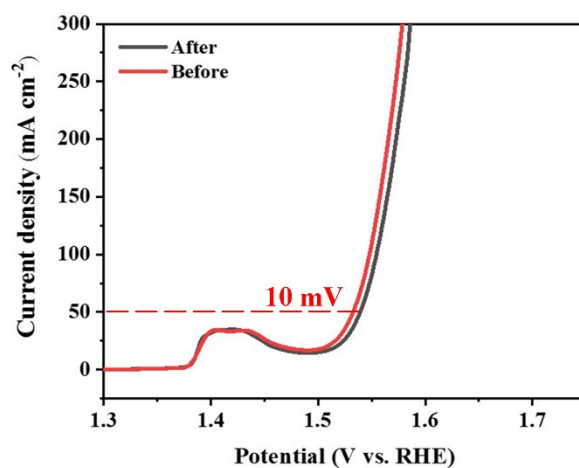

**Figure S9.** OER LSVs of Fe/Ni NWs/NF before and after stability test

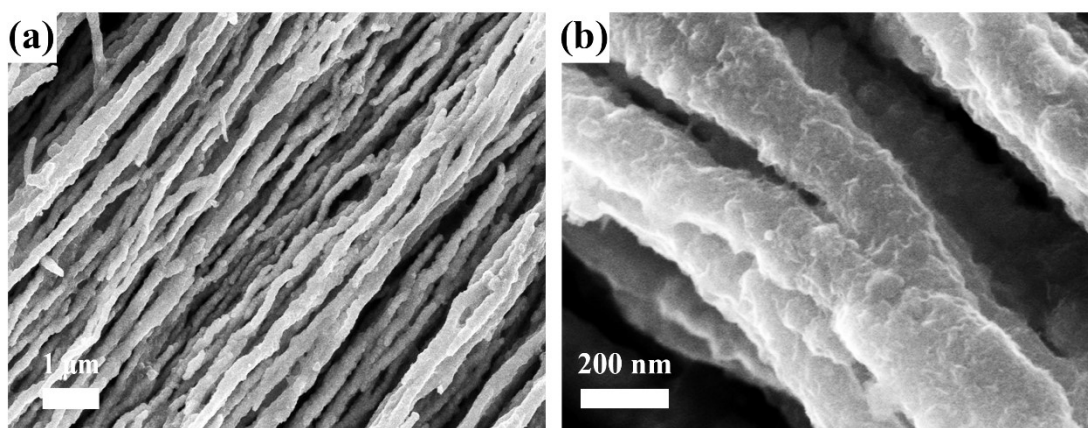

**Figure S10.** SEM image of Fe/Ni NWs/NF after stability test.



**Table S3.** The samples prepared were compared with those in the literature.

| Catalysts                                               | Overpotential                         | Tafel slope             | Electrolyte | Ref       |
|---------------------------------------------------------|---------------------------------------|-------------------------|-------------|-----------|
|                                                         | (mV) at 10/100<br>mA cm <sup>-2</sup> | (mV dec <sup>-1</sup> ) |             |           |
| Fe/Ni NWs/NF                                            | 318/100                               | 55.8                    | 1 M KOH     | This work |
| Ni <sub>0.83</sub> Fe <sub>0.17</sub> (OH) <sub>2</sub> | 245/10                                | 61                      | 1 M KOH     | [1]       |
| NiFe LDH/GC                                             | 347/10                                | 67                      | 1 M KOH     | [2]       |
| Fe <sup>2+</sup> -NiFe-LDH-<br>EO6 h@NF                 | 285/100                               | 48                      | 1 M KOH     | [3]       |
| FeCoOH                                                  | 320/100                               | /                       | 1 M KOH     | [4]       |
| Ag NW@Ni(OH) <sub>2</sub><br>NS                         | 290/100                               | 58.1                    | 1 M KOH     | [5]       |
| Fe-BDC/Co(OH) <sub>2</sub>                              | 268/10                                | 41                      | 1 M KOH     | [6]       |
| Ni <sub>0.8</sub> Fe <sub>0.2</sub> -AHNA               | 190/10                                | 34.7                    | 1 M KOH     | [7]       |
| NiFeOOH/NiFe/Ni                                         | 240/100                               | 50                      | 1 M KOH     | [8]       |
| Ni <sub>2</sub> P/NiFeP/NF                              | 270/100                               | 35                      | 1 M KOH     | [9]       |
| ANC-Fe <sub>1</sub> Ni <sub>2</sub>                     | 266/10                                | 39                      | 1 M KOH     | [10]      |
| FeCo/NF                                                 | 220/10                                | 40                      | 1 M KOH     | [11]      |

## Reference:

- 1 Zhou, Q.; Chen, Y.; Zhao, G., et al. Active-Site-Enriched Iron-Doped Nickel/Cobalt Hydroxide Nanosheets for Enhanced Oxygen Evolution Reaction. *ACS Catalysis* **8**, 5382-5390, doi:10.1021/acscatal.8b01332 (2018).
- 2 Song, F.; Hu, X. Exfoliation of layered double hydroxides for enhanced oxygen evolution catalysis. *Nature Communications* **5**, 4477, doi:10.1038/ncomms5477 (2014).
- 3 Wang, Y.; Zhang, X.; Huang, L., et al. Electrooxidation-enabled electroactive high-valence ferritic species in NiFe layered double hydroxide arrays as efficient oxygen evolution catalysts. *Journal of Colloid and Interface Science* **599**, 168-177, doi:<https://doi.org/10.1016/j.jcis.2021.04.099> (2021).
- 4 Lang, Z.; Song, G.-L.; Wu, P., et al. A corrosion-reconstructed and stabilized economical Fe-based catalyst for oxygen evolution. *Nano Research*, doi:10.1007/s12274-022-5006-y (2022).
- 5 Nguyen, V.-T.; Nguyen, V.-C.; Phan, T. C., et al. Boosting electrocatalytic oxygen evolution activity by in-situ growth of hierarchical vertically-erected Ni(OH)<sub>2</sub> nanosheets on Ag nanowires. *International Journal of Hydrogen Energy* **47**, 31614-31623, doi:<https://doi.org/10.1016/j.ijhydene.2022.06.017> (2022).
- 6 Xiao, L.; Wu, H.; Zhang, Y., et al. Electronic and Nano-structural Modulation of Co(OH)<sub>2</sub> Nanosheets by Fe-Benzenedicarboxylate for Efficient Oxygen Evolution. *Chemical Research in Chinese Universities*, doi:10.1007/s40242-022-2228-1 (2022).
- 7 Liang, C.; Zou, P.; Nairan, A., et al. Exceptional performance of hierarchical Ni-Fe oxyhydroxide@NiFe alloy nanowire array electrocatalysts for large current density water splitting. *Energy & Environmental Science* **13**, 86-95, doi:10.1039/C9EE02388G (2020).

- 8 Wu, Y.; Wang, H.; Ji, S., et al. Ultrastable NiFeOOH/NiFe/Ni electrocatalysts prepared by in-situ electro-oxidation for oxygen evolution reaction at large current density. *Applied Surface Science* **564**, 150440, doi:<https://doi.org/10.1016/j.apsusc.2021.150440> (2021).
- 9 Wu, Y.; Sun, C.; Wang, H., et al. Ni<sub>2</sub>P nanoparticles-inserted NiFeP nanosheets with rich interfaces as efficient catalysts for the oxygen evolution reaction. *Journal of Alloys and Compounds* **903**, 163855, doi:<https://doi.org/10.1016/j.jallcom.2022.163855> (2022).
- 10 Cao, Y.; Su, Y.; Xu, L., et al. Oxygen vacancy-rich amorphous FeNi hydroxide nanoclusters as an efficient electrocatalyst for water oxidation. *Journal of Energy Chemistry* **71**, 167-173, doi:<https://doi.org/10.1016/j.jechem.2022.03.044> (2022).
- 11 Babar, P.; Lokhande, A.; Shin, H. H., et al. Cobalt Iron Hydroxide as a Precious Metal-Free Bifunctional Electrocatalyst for Efficient Overall Water Splitting. *Small* **14**, 1702568, doi:<https://doi.org/10.1002/sml.201702568> (2018).
